# Supplementary material
Source: publisher figshare collection journal article supplement (https://acs.figshare.com/ndownloader/files/17385461)
Supplement: Supplementary file 2 [file 17385461]

Date: 20 August 2020

**To:** ACS

Publisher's/Copyright Owner's Contact Information

\_\_\_\_\_

\_\_\_\_\_

\_\_\_\_\_

Publisher's/Copyright Owner's Email Address

I am preparing an *ACS LiveSlides* entitled:

Title of ACS Publication and DOI

I would appreciate your permission to use the following material in all formats including but not limited to print, microform, electronic, and/or CD-ROM from the following reference:

**Collective Photograph (s) representing the following groups:**

If you, the photographer, have a required **credit line**, please include it below:

For your convenience, you may sign and date the bottom of this letter to indicate your agreement. Please return this form to me at the above email address, by the above **deadline date** (if given above). Thank you.

**SIGN HERE**

Submit completed and signed form with your signed *ACS LiveSlides* Video Release. 7/25/16
